# Supplementary material for: A quinoline–benzothiazole hybrid as the first near-infrared fluorescent probe for transthyretin
Source: Royal Society of Chemistry journal article supplement (doi:10.1039/d1nj02472h), 2021-01-01
Supplement: d1nj02472h1.pdf [file d1nj02472h1.pdf]

**Electronic Supplementary Information**

**A quinoline-benzothiazole hybrid as the first near-infrared fluorescent probe for  
transthyretin**

Jinsheng Liu<sup>a,†</sup>, Yinghong Xiong<sup>a,†</sup>, Yanan Huang<sup>b</sup>, Xinyin Zhu<sup>a</sup>, Yu Liu<sup>b</sup>, Lei Zhang<sup>a</sup>  
and Jinwu Yan<sup>a\*</sup>

<sup>a</sup>. MOE International Joint Research Laboratory on Synthetic Biology and Medicines,  
School of Biology and Biological Engineering, South China University of  
Technology, Guangzhou 510006, PR China.

<sup>b</sup>. CAS Key Laboratory of Separation Science for Analytical Chemistry, Dalian  
Institute of Chemical Physics, Chinese Academy of Sciences, 457 Zhongshan Road,  
Dalian 116023, PR China

\* Corresponding authors: [yjw@scut.edu.cn](mailto:yjw@scut.edu.cn).

## Table of Contents

|                                                                                                                                                                                                                                                                                                                                                                                                                                                                                                                                                                                       |    |
|---------------------------------------------------------------------------------------------------------------------------------------------------------------------------------------------------------------------------------------------------------------------------------------------------------------------------------------------------------------------------------------------------------------------------------------------------------------------------------------------------------------------------------------------------------------------------------------|----|
| General Information.....                                                                                                                                                                                                                                                                                                                                                                                                                                                                                                                                                              | 2  |
| Fluorescence assay with WT-TTR.....                                                                                                                                                                                                                                                                                                                                                                                                                                                                                                                                                   | 3  |
| Fluorometric assay in solvent of variable polarity.....                                                                                                                                                                                                                                                                                                                                                                                                                                                                                                                               | 4  |
| Viscosity titration assay.....                                                                                                                                                                                                                                                                                                                                                                                                                                                                                                                                                        | 4  |
| WT-TTR titration assay.....                                                                                                                                                                                                                                                                                                                                                                                                                                                                                                                                                           | 4  |
| TTR stability assay.....                                                                                                                                                                                                                                                                                                                                                                                                                                                                                                                                                              | 5  |
| Calculation of the detection limit.....                                                                                                                                                                                                                                                                                                                                                                                                                                                                                                                                               | 5  |
| Determination of quantum yield.....                                                                                                                                                                                                                                                                                                                                                                                                                                                                                                                                                   | 5  |
| Table S1: Reported examples of WT-TTR fluorescent probes or sensors.....                                                                                                                                                                                                                                                                                                                                                                                                                                                                                                              | 6  |
| Figure S1: The emission intensity histogram of <b>QCN-2</b> (14.4 $\mu$ M) before and after incubation 1h with WT-TTR (14.4 $\mu$ M) in PBS and incubation with WT-TTR unfolded by guanidine hydrochloride (6M) dissociated. $\lambda_{em}$ =648nm.....                                                                                                                                                                                                                                                                                                                               | 8  |
| Figure S2: The fluorescence intensity histogram of <b>QCN-2</b> (1 $\mu$ M) with different metal ions, amino acids or proteins (10 $\mu$ M; 1: control, 2: Al <sup>3+</sup> , 3: Cu <sup>+</sup> , 4: Zn <sup>2+</sup> ,5: Fe <sup>3+</sup> , 6: Fe <sup>2+</sup> , 7: K <sup>+</sup> , 8: Na <sup>+</sup> , 9: Mg <sup>2+</sup> , 10: Pd <sup>2+</sup> , 11: Cu <sup>2+</sup> , 12: Cd <sup>2+</sup> , 13: Ni <sup>+</sup> , 14: Met, 15: Arg, 16: Glu, 17: Cys, 18: Ala, 19: GSH, 20: Asp, 21:Lys, 22: Ser, 23: Ile, 24: HAS, 25: BSA, 26: A $\beta$ aggregates, 27: WT-TTR). ..... | 8  |
| Figure S3 : The photostability assay of <b>QCN-2</b> (10 $\mu$ M) under UV-light. ....                                                                                                                                                                                                                                                                                                                                                                                                                                                                                                | 9  |
| Figure S4 : The pH stability assay of <b>QCN-2</b> (10 $\mu$ M) in Na <sub>2</sub> HPO <sub>4</sub> -NaH <sub>2</sub> PO <sub>4</sub> solution. ....                                                                                                                                                                                                                                                                                                                                                                                                                                  | 9  |
| Figure S5 : The linear relationship of <b>QCN-2</b> (10 $\mu$ M) between max emission wavelength and glycerol fraction. ....                                                                                                                                                                                                                                                                                                                                                                                                                                                          | 10 |
| Figure S6: (A) The fluorescence intensity (B) The relative fluorescence intensity of <b>QCN-2</b> (5 $\mu$ M) in octanol and EtOH-H <sub>2</sub> O system; (C) The max emission wavelength of <b>QCN-2</b> in octanol and EtOH-H <sub>2</sub> O system; (D) The fluorescence intensity of <b>QCN-2</b> in different percentages of H <sub>2</sub> O: EtOH system. ....                                                                                                                                                                                                                | 10 |
| Table S2: The spectroscopy properties of <b>QCN-2</b> . ....                                                                                                                                                                                                                                                                                                                                                                                                                                                                                                                          | 11 |
| Figure S7 : The SH-SY5Y cells survival assay of <b>QCN-2</b> from 0 $\mu$ M to 100 $\mu$ M. ....                                                                                                                                                                                                                                                                                                                                                                                                                                                                                      | 11 |
| Figure S8 : The OD <sub>330</sub> detecting spectra of <b>QCN-2</b> (0 $\mu$ M, 3.6 $\mu$ M, 7.2 $\mu$ M, 14.4 $\mu$ M and 28.8 $\mu$ M) and tafamidis (3.6 $\mu$ M) inhibits TTR-L55P-His protein (7.2 $\mu$ M) aggregation in PBS (pH 7.4)....                                                                                                                                                                                                                                                                                                                                      | 12 |
| Figure S9 : <sup>1</sup> H NMR (Chloroform-d) spectrum of compound <b>2</b> (400 MHZ). ....                                                                                                                                                                                                                                                                                                                                                                                                                                                                                           | 12 |
| Figure S10 : <sup>1</sup> H NMR (Chloroform-d) spectrum of compound <b>3</b> (400 MHZ). ....                                                                                                                                                                                                                                                                                                                                                                                                                                                                                          | 13 |
| Figure S11 : <sup>1</sup> H NMR (Chloroform-d) spectrum of <b>QCN-2</b> (400MHZ).....                                                                                                                                                                                                                                                                                                                                                                                                                                                                                                 | 13 |
| Figure S12 : <sup>13</sup> C NMR (Chloroform-d) spectrum of <b>QCN-2</b> . ....                                                                                                                                                                                                                                                                                                                                                                                                                                                                                                       | 14 |
| Figure S13: The HRMS spectrum of <b>QCN-2</b> . ....                                                                                                                                                                                                                                                                                                                                                                                                                                                                                                                                  | 14 |
| Figure S14: The elemental analysis data of <b>QCN-2</b> . ....                                                                                                                                                                                                                                                                                                                                                                                                                                                                                                                        | 14 |
| Reference .....                                                                                                                                                                                                                                                                                                                                                                                                                                                                                                                                                                       | 15 |

## General Information

All chemicals were purchased from commercial sources unless otherwise specified.

All the solvents were of analytical reagent grade and were used without further

purification.

Various amino acids (Ala, Arg, Asp, Cys, Glu, GSH, Lys, Ile, Met, Ser) were purchased from Sigma-Aldrich and its stock solution (10 mM) were obtained by diluting in PBS (pH 7.4). Metal ion ( $\text{Na}^+$ ,  $\text{K}^+$ ,  $\text{Fe}^{2+}$ ,  $\text{Fe}^{3+}$ ,  $\text{Zn}^{2+}$ ,  $\text{Al}^{3+}$ ,  $\text{Cu}^+$ ,  $\text{Cu}^{2+}$ ,  $\text{Mg}^{2+}$ ,  $\text{Ni}^+$ ,  $\text{Cd}^{2+}$ ) stock solutions (10 mM) were obtained by diluting the standard solutions of the corresponding chlorine salt or Sulfate salt. Column-layer chromatographic silica gel was purchased from Branch of Qingdao Haiyang Chemical Co, Ltd. Flash column chromatography was performed with silica gel (100-200 mesh) purchased from Qingdao Haiyang Chemical Co., Ltd.  $^1\text{H}$  and  $^{13}\text{C}$  NMR spectra were recorded using TMS as the internal standard in  $\text{CDCl}_3$  with a Bruker BioSpin GmbH spectrometer at 400 MHz and 100 MHz, respectively. Ultra-high resolution mass spectra (UHR-MS) were taken on a Thermo QExactiveplus instrument.

The UV-vis absorption spectra were recorded on a UV-2600 spectrophotometer (Shimadzu, Japan). Fluorescence measurements were performed on an RF-6000 fluorescence spectrophotometer (Shimadzu, Japan) equipped with quartz cell of 10.0 mm path length. And the fluorescent spectra were measured by Tecan Spark Fluorescence Plate Reader by using BeyoGold™ 96-Well Black Opaque plates. The cell Culture and MTT assay can be seen in our previous work<sup>1</sup>.

#### Fluorescence assay with WT-TTR

WT-TTR was expressed and purified from an E. coli expression system as described previously. QCN-2 (1  $\mu\text{L}$  of a 1.44 mM solution in DMSO, final concentration 14.4

$\mu\text{M}$ ) was added to 100  $\mu\text{L}$  of solution of WT-TTR homotetramer (0.4 mg/mL, 14.4  $\mu\text{M}$ ) in 10 mM phosphate, 100 mM KCl, and 1 mM EDTA (pH 7.0 phosphate buffer) in a 2 mL EP tube. The mixture was vortexed and preincubated at room temperature for 30 min. The fluorescence changes were monitored using a Tecan Spark Fluorescence Plate Reader.

#### Fluorometric assay in solvent of variable polarity

Probe **QCN-2** (2  $\mu\text{L}$  of a 10 mM solution in DMSO) was added to 4mL of solvent (DCM, THF, EtOH, EA, MeOH, ACN, DMSO, H<sub>2</sub>O) to give a final concentration of 5  $\mu\text{M}$ . The absorption and emission spectra were recorded at room temperature using a UV-2600 spectrophotometer and RF-6000 fluorescence spectrophotometer.

#### Viscosity titration assay

Probe **QCN-2** (10 mM solution in DMSO) was dissolved in a solution of glycerol-water system (glycerin ratio was 0 %-90 %) to give a final concentration of 10  $\mu\text{M}$ . The samples were vortexed, and the fluorescence spectrum was detected using RF-6000 fluorescence spectrophotometer. The excitation wavelength was 587 nm.

#### WT-TTR titration assay

Probe **QCN-2** (1.5  $\mu\text{L}$ , 6 mM solution in DMSO) were added to 150  $\mu\text{L}$  of a solution of WT-TTR (0–57.6  $\mu\text{M}$ ) in 1 $\times$ PBS. The samples were vortexed, and incubated for 1h at room temperature. The fluorescence changes were monitored using a Tecan Spark Fluorescence Plate Reader.

### TTR stability assay

TTR-L55P protein and **QCN-2** were mixed together in acidic aggregation buffer (NaOAc 200  $\mu$ M, KCl 100  $\mu$ M, acidified by AcOH to Ph=4.4). Final concentration of TTR-L55P protein was 7.2  $\mu$ M and Final concentration of **QCN-2** was 0 $\mu$ M, 3.6 $\mu$ M, 7.2 $\mu$ M, 14.4 $\mu$ M and 28.8  $\mu$ M. The mixture was incubated at temperature (37°C). The fluorescence changes were monitored using a Tecan Spark Fluorescence Plate Reader.

### Calculation of the detection limit

The detection limit was calculated according to the following equation (1)<sup>2</sup>. The fluorescence spectrum of fluorescence probe and the standard deviation of blank measurement were measured. The linear relationship between fluorescence intensity of probe at 648 nm and concentration of QCN-2 was measured to get the slope.

$$\text{Detection limit} = 3\sigma/k \quad (1)$$

$\sigma$  and  $k$  are the standard deviation and the slope of the regression line, respectively.

### Determination of quantum yield

The fluorescence quantum yields of **QCN-2** were tested by the following equation (2)<sup>3</sup>.

$$\Phi = \Phi_s \times \frac{A_s \times OD \times \eta^2}{A \times OD_s \times \eta_s^2} \quad (2)$$

$\Phi$  is the quantum yield of **QCN-2**,  $\Phi_s$  is the quantum yield of R6G ( $\Phi=0.95$ , ethanol).

OD and A represented the fluorescence integral area and the absorbance, respectively.

Table S1: Reported examples of WT-TTR fluorescent probes or sensors

| Probe Name | Structure                                                                           | Excitation wavelength | Emission wavelength | Stokes shift | FI fold increase | Kd           | Ref. |
|------------|-------------------------------------------------------------------------------------|-----------------------|---------------------|--------------|------------------|--------------|------|
| 10         | 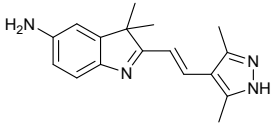   | 357nm                 | 476nm               | 119 nm       | 111              | —            | 4    |
| 5          |    | 388nm                 | 513nm               | 125 nm       | 13               | —            | 4    |
| 5          |  | 411nm                 | 486nm               | 75 nm        | 35               | —            | 5    |
| A2         |  | 328nm                 | 430nm               | 102 nm       | —                | —            | 6    |
| 11         |  | 395nm                 | 505nm               | 110 nm       | 8.6              | 2.9 ± 0.2 μM | 7    |
| 5          |  | 337nm                 | 415nm               | 78 nm        | 15.8             | 20 ± 10      | 8    |

|                 |                                                                                     |       |       |       |    |         |               |
|-----------------|-------------------------------------------------------------------------------------|-------|-------|-------|----|---------|---------------|
|                 |                                                                                     |       |       |       |    | n       |               |
|                 |                                                                                     |       |       |       |    | M       |               |
| <b>Nile red</b> | 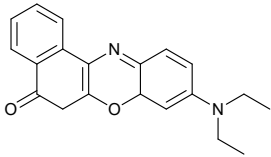   | 530nm | 610nm | 80nm  | 11 | —       | <sup>9</sup>  |
| <b>4</b>        |    | 327nm | 395nm | 68nm  | —  | —       | <sup>10</sup> |
| <b>5</b>        |    | 365nm | 520nm | 155nm | —  | —       | <sup>11</sup> |
| <b>4</b>        |   | 345nm | 481nm | 136nm | —  | 2n<br>M | <sup>12</sup> |
| <b>QCN-2</b>    |  | 487nm | 694nm | 207nm | 25 | —       | this work     |

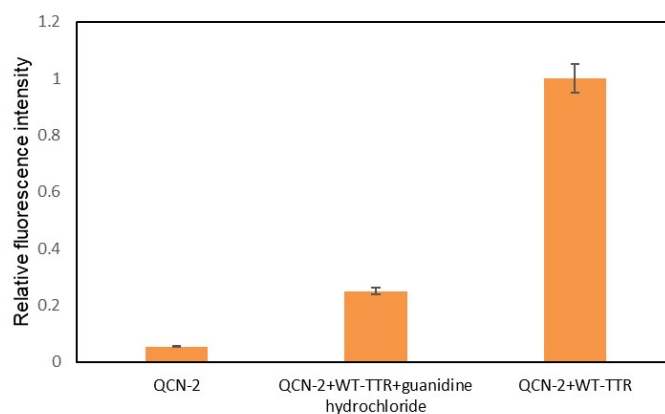Figure S1: The emission intensity histogram of QCN-2(14.4 $\mu$ M) before and after

incubation 1h with WT-TTR (14.4 $\mu$ M) in PBS and incubation with WT-TTR unfolded by guanidine hydrochloride (6M) dissociated.  $\lambda_{em}=648nm$

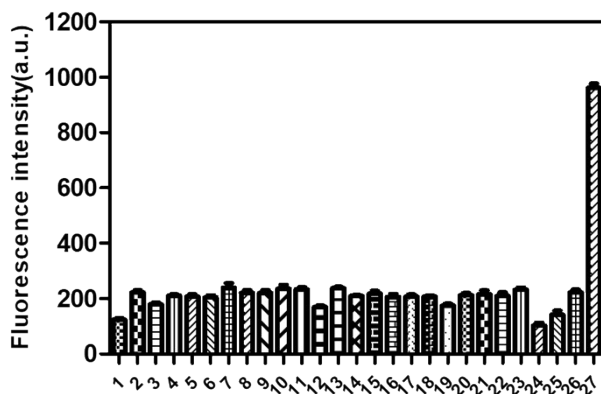

Figure S2: The fluorescence intensity histogram of QCN-2 (1  $\mu$ M) with different metal ions, amino acids or proteins (10  $\mu$ M; 1: control, 2: Al<sup>3+</sup>, 3: Cu<sup>+</sup>, 4: Zn<sup>2+</sup>, 5: Fe<sup>3+</sup>, 6: Fe<sup>2+</sup>, 7: K<sup>+</sup>, 8: Na<sup>+</sup>, 9: Mg<sup>2+</sup>, 10: Pd<sup>2+</sup>, 11: Cu<sup>2+</sup>, 12: Cd<sup>2+</sup>, 13: Ni<sup>+</sup>, 14: Met, 15: Arg, 16: Glu, 17: Cys, 18: Ala, 19: GSH, 20: Asp, 21: Lys, 22: Ser, 23: Ile, 24: HAS, 25: BSA, 26: A $\beta$ aggregates, 27: WT-TTR).

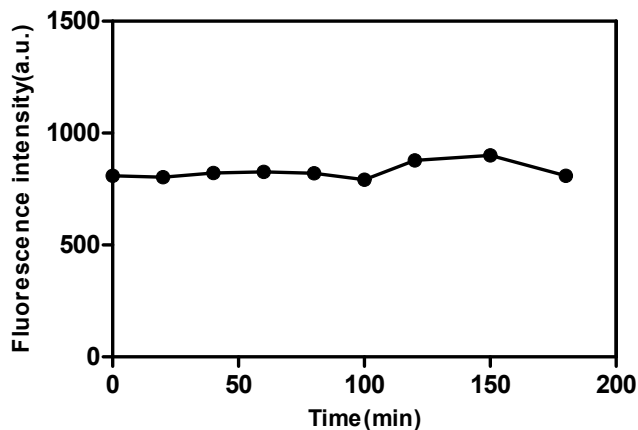

Figure S3 : The photostability assay of QCN-2 (10 $\mu$ M) under UV-light.



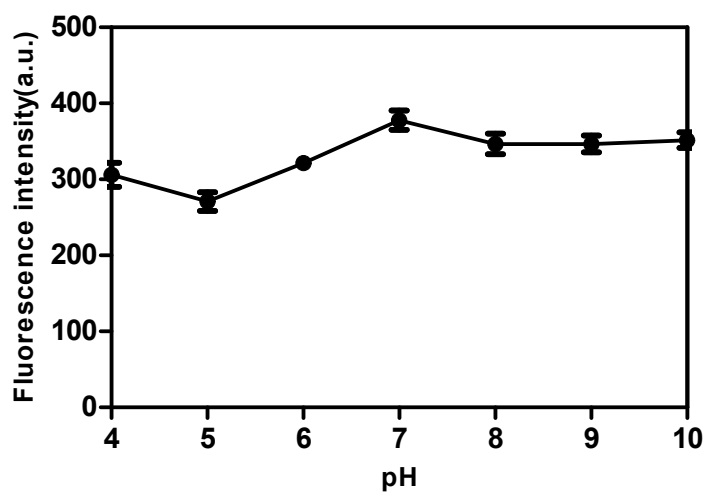

Figure S4 : The pH stability assay of QCN-2 (10 μM) in Na<sub>2</sub>HPO<sub>4</sub>-NaH<sub>2</sub>PO<sub>4</sub> solution.

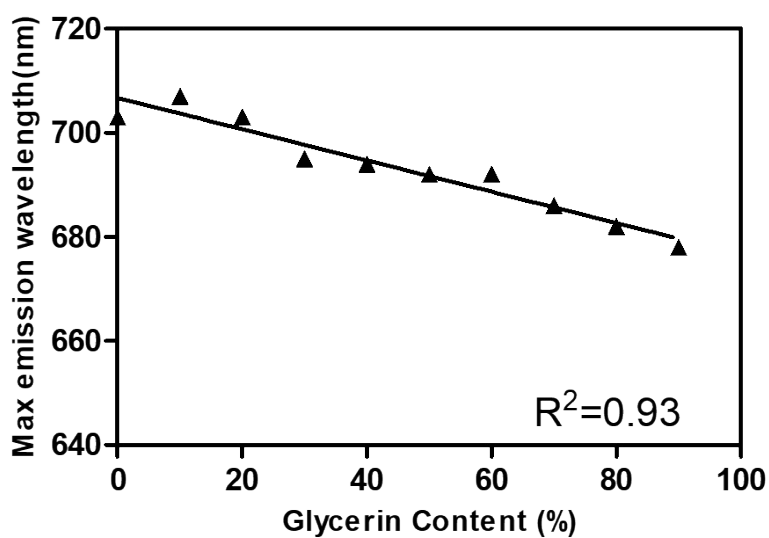

Figure S5 : The linear relationship of QCN-2 (10 μM) between max emission wavelength and glycerol fraction.

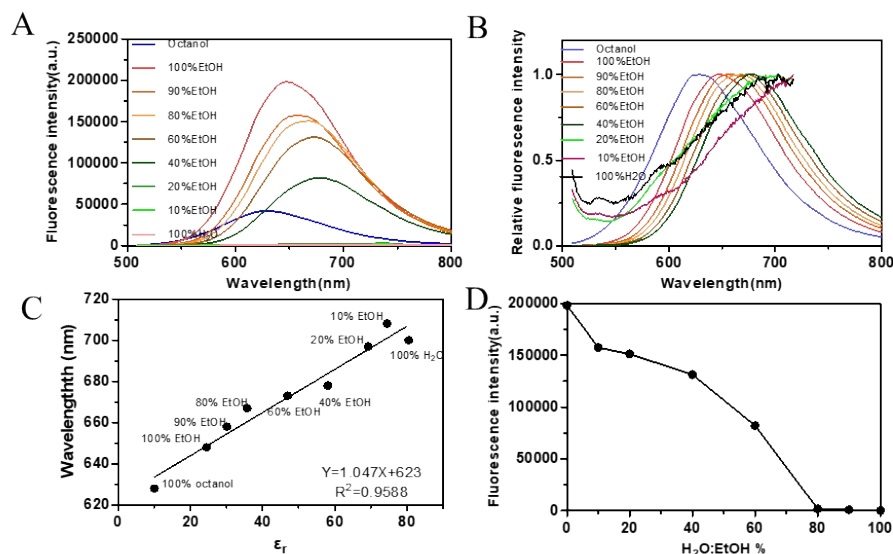

Figure S6: (A) The fluorescence intensity (B) The relative fluorescence intensity of QCN-2 (5  $\mu$ M) in octanol and EtOH-H<sub>2</sub>O system; (C) The max emission wavelength of QCN-2 in octanol and EtOH-H<sub>2</sub>O system; (D) The fluorescence intensity of QCN-2 in different percentages of H<sub>2</sub>O: EtOH system.

Table S2: The spectroscopy properties of QCN-2.

| $\lambda_{\text{abs}}^a$<br>(nm) | $\lambda_{\text{em1}}^b$<br>(nm) | Stock'<br>s shift<br>(nm) | $\lambda_{\text{em2}}^c$<br>(nm) | fold <sup>d</sup> | $\Phi_{\text{DCM}}^e$ | $\Phi_{\text{THF}}$ | $\Phi_{\text{EtOH}}$ | $\Phi_{\text{ACN}}$ | $\Phi_{\text{MeOH}}$ | $\Phi_{\text{H}_2\text{O}}$ |
|----------------------------------|----------------------------------|---------------------------|----------------------------------|-------------------|-----------------------|---------------------|----------------------|---------------------|----------------------|-----------------------------|
| 487                              | 694                              | 207                       | 648                              | 25                | 0.317                 | 0.213               | 0.242                | 0.245               | 0.220                | 0.007                       |

<sup>a</sup>Absorption wavelength measured in PBS; <sup>b</sup>emission wavelength measured in PBS;

<sup>c</sup>emission wavelength after binding with WT-TTR; <sup>d</sup>fold increase in fluorescence

intensity upon binding with WT-TTR; <sup>e</sup>fluorescence quantum yield in different

solvents.

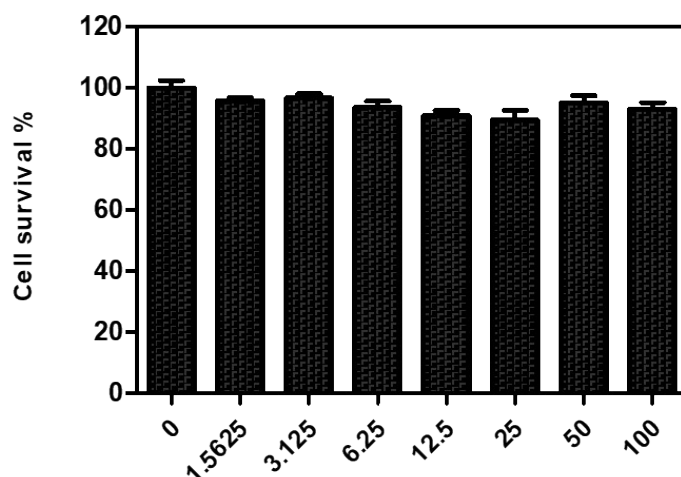

Figure S7 : The SH-SY5Y cells survival assay of QCN-2 from 0  $\mu\text{M}$  to 100  $\mu\text{M}$ .

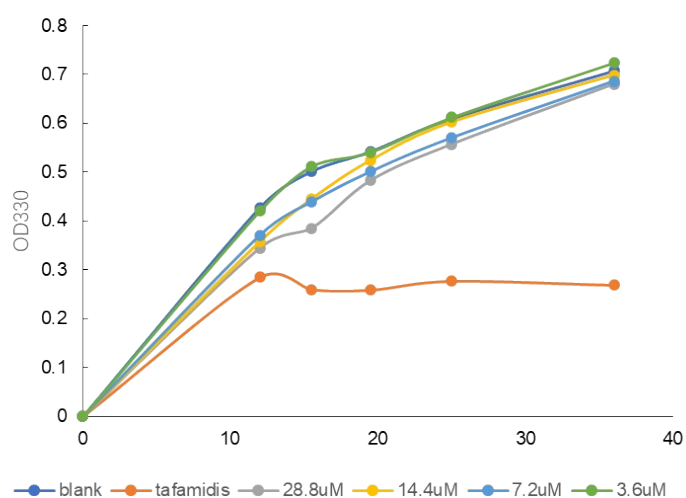

Figure S8 : The OD<sub>330</sub> detecting spectra of QCN-2 (0  $\mu\text{M}$ , 3.6  $\mu\text{M}$ , 7.2  $\mu\text{M}$ , 14.4  $\mu\text{M}$  and 28.8  $\mu\text{M}$ ) and tafamidis (3.6  $\mu\text{M}$ ) inhibits TTR-L55P-His protein (7.2  $\mu\text{M}$ ) aggregation in PBS (pH 7.4).

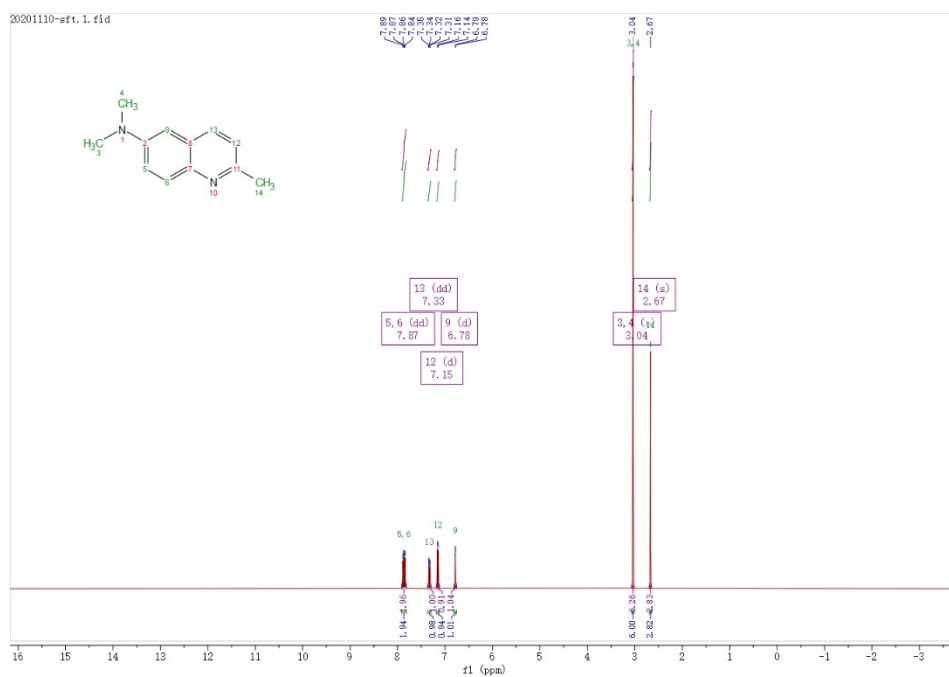

Figure S9 :  $^1\text{H}$  NMR (Chloroform-d) spectrum of compound **2** (400 MHz).

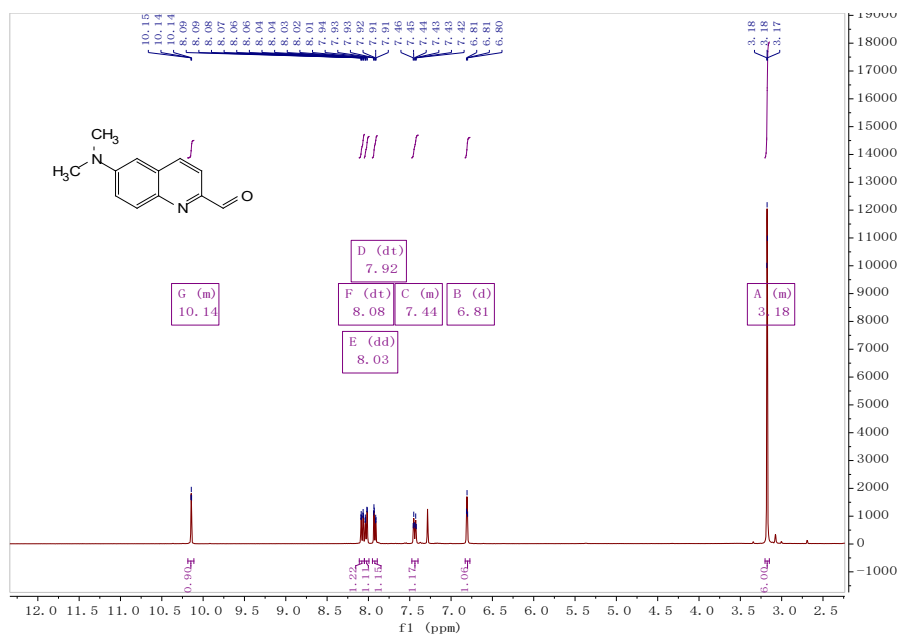

Figure S10 :  $^1\text{H}$  NMR (Chloroform-d) spectrum of compound **3** (400 MHz).

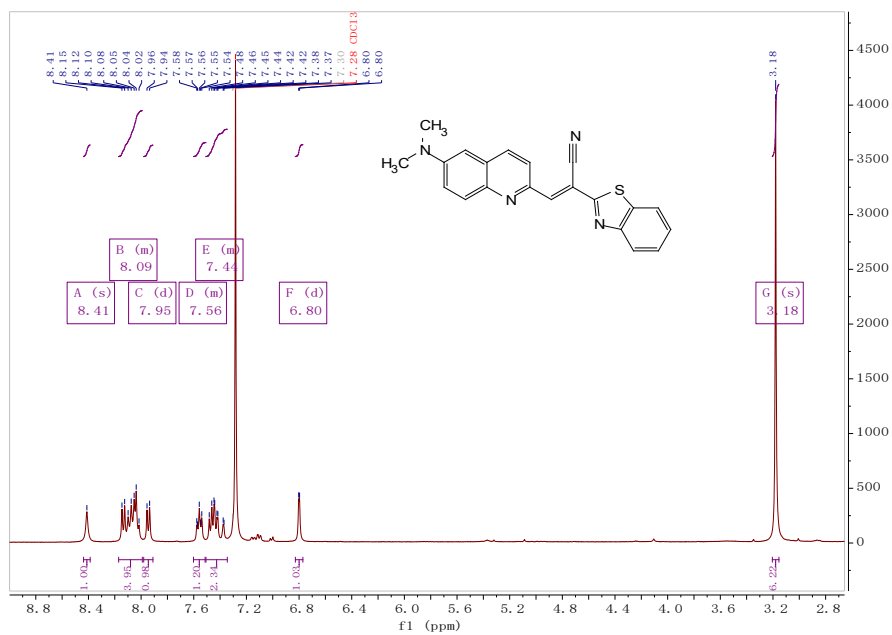

Figure S11 :  $^1\text{H}$  NMR (Chloroform-d) spectrum of QCN-2 (400MHZ)

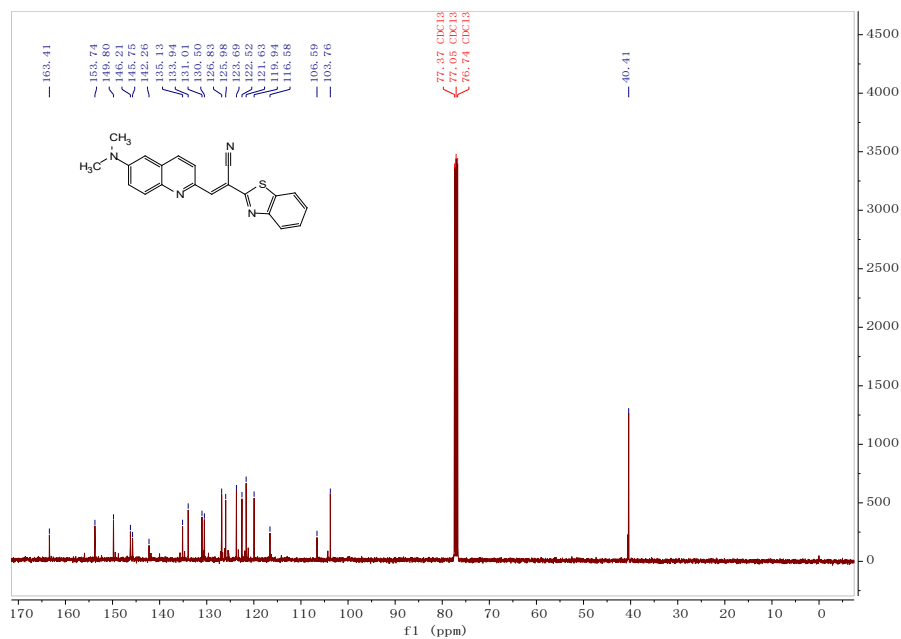

Figure S12 :  $^{13}\text{C}$  NMR (Chloroform-d) spectrum of QCN-2.

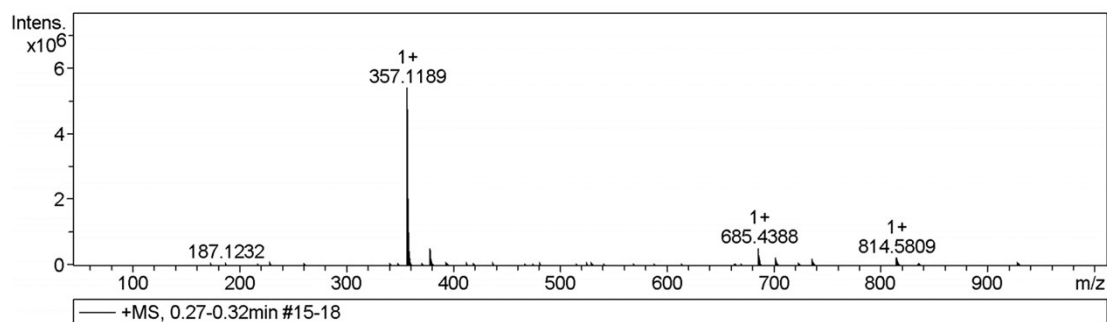

Figure S13: The HRMS spectrum of QCN-2.

analytic functional testing  
 UNICUBE  
 serial number: 0400.191023

| Samples |                |      |        |          |          |          |          |           |       |
|---------|----------------|------|--------|----------|----------|----------|----------|-----------|-------|
|         | Weight<br>[mg] | Name | Method | N<br>[%] | C<br>[%] | H<br>[%] | S<br>[%] | Date      | Time  |
| 15      | 1.096000       | liu  | 2mg    | 15.61    | 69.57    | 4.489    | 9.8811   | 2021/4/30 | 15:56 |

Figure S14: The elemental analysis data of QCN-2.

## Reference

1. H. Y. Tan, Y. T. Qiu, H. Sun, J. W. Yan and L. Zhang, *Chem. Commun.*, 2019, **55**, 2688-2691.
2. H. Xu and M. Hepel, *Anal. Chem.*, 2011, **83**, 813-819.
3. J. Li, Y. Cui, C. Bi, S. Feng, F. Yu, E. Yuan, S. Xu, Z. Hu, Q. Sun, D. Wei and J. Yoon, *Anal. Chem.*, 2019, **91**, 7360-7365.
4. H. R. Lim, S. Y. Kim, E. H. Jeon, Y. L. Kim, Y. M. Shin, T. S. Koo, S. J. Park, K. B. Hong and S. Choi, *Chem. Commun. (Camb.)*, 2019, **55**, 10424-10427.
5. N. Myung, S. Connelly, B. Kim, S. J. Park, I. A. Wilson, J. W. Kelly and S. Choi, *Chem. Commun. (Camb.)*, 2013, **49**, 9188-9190.
6. Sungwook Choi, Derrick Sek Tong Ong and J. W. Kelly, 2010.
7. R. I. Campos, X. Wu, M. Elgland, P. Konradsson and P. Hammarstrom, *ACS Chem. Neurosci.*, 2016, **7**, 924-940.
8. J. Zhang, A. Sandberg, X. Wu, S. Nystrom, M. Lindgren, P. Konradsson and P. Hammarstrom, *ACS Omega*, 2017, **2**, 4693-4704.
9. R. Mishra, D. Sjolander and P. Hammarstrom, *Mol. Biosyst.*, 2011, **7**, 1232-1240.
10. E. H. Suh, Y. Liu, S. Connelly, J. C. Genereux, I. A. Wilson and J. W. Kelly, *J. Am. Chem. Soc.*, 2013, **135**, 17869-17880.

11. N. P. Grimster, S. Connelly, A. Baranczak, J. Dong, L. B. Krasnova, K. B. Sharpless, E. T. Powers, I. A. Wilson and J. W. Kelly, *J. Am. Chem. Soc.*, 2013, **135**, 5656-5668.
12. A. Baranczak, Y. Liu, S. Connelly, W. G. Du, E. R. Greiner, J. C. Genereux, R. L. Wiseman, Y. S. Eisele, N. C. Bradbury, J. Dong, L. Noodleman, K. B. Sharpless, I. A. Wilson, S. E. Encalada and J. W. Kelly, *J. Am. Chem. Soc.*, 2015, **137**, 7404-7414.
